# Supplementary material
Source: HighWire-hosted journal article supplement (https://gut.bmj.com/content/70/8/1431)
Supplement: inline-supplementary-material-1 [file inline-supplementary-material-1.pdf]

## Supplemental Table 1: Categorization of procedures based on indications

### Urgent

- Ascending cholangitis
- Bile leak
- Symptomatic bile duct stones
- Malignant obstructive jaundice with or without pruritis
- Drainage of symptomatic walled-off necrosis/pseudocyst
- Acute GI bleeding
- Dilation of symptomatic luminal strictures causing obstructive symptoms
- Feeding tube placement in patients unable to tolerate po intake
- ESD/EMR of carcinoma-in-situ lesions
- Suspected malignancy requiring biopsy of solid mass lesions (EUS-FNB)
- Lumen-apposing metal stent removal

### Semi-urgent

- Ampullary neoplasia/nodular Barrett's with high-grade dysplasia
- Pancreatic duct stent removal
- EUS Staging of GI malignancies pending neoadjuvant/palliative therapy
- Scheduled biliary stent change in status-post liver transplantation

### Routine

- All other indications

**Abbreviations:** EMR, endoscopic mucosal resection; ESD, endoscopic submucosal dissection; EUS-FNB, endoscopic ultrasound-guided fine needle biopsy
